# Supplementary material for: Water and oxygen co-induced microstructure relaxation and evolution in CH3NH3PbI3
Source: Royal Society of Chemistry journal article supplement (doi:10.1039/d1cp02704b), 2021-01-01
Supplement: d1cp02704b1.pdf [file d1cp02704b1.pdf]

## Electronic Supplementary Information

Water and oxygen co-induced microstructure relaxation and evolution in

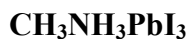

Guangcheng Wu<sup>a1</sup>, Xuting Dong<sup>a1</sup>, Jingwei Xiu<sup>b</sup>, Yao Yu<sup>c</sup>, Min Gu<sup>d</sup>, Tong B. Tang<sup>e</sup>,  
Zewen Zuo<sup>a</sup>, Yong Liu<sup>f</sup>, and Guanglei Cui<sup>a\*</sup>

<sup>a</sup> Anhui Province Key Laboratory of Optoelectric Materials Science and Technology,  
School of Physics and Electronics Information, Anhui Normal University, Wuhu,  
241002, China

<sup>b</sup> Department of Materials Science and Engineering, Southern University of Science  
and Technology, Shenzhen 518055, China

<sup>c</sup> School of Materials Science and Engineering, Huazhong University of science and  
Technology, Wuhan 430074, China

<sup>d</sup> National Laboratory of Solid State Microstructures, Nanjing University, Nanjing,  
210093, China

<sup>e</sup> Department of Physics, Hong Kong Baptist University, Kowloon, Hong Kong SAR,  
China. Now at Asia Power Development, 2502 Win Plaza, San Po Kong, Hong Kong  
SAR, China

<sup>f</sup> Key Laboratory of Photovoltaic and Energy Conservation Materials, CAS, Hefei,  
230088, China

\* corresponding Author. E-mail: [glcui@ahnu.edu.cn](mailto:glcui@ahnu.edu.cn)

<sup>1</sup> These two authors contribute equally to this work.

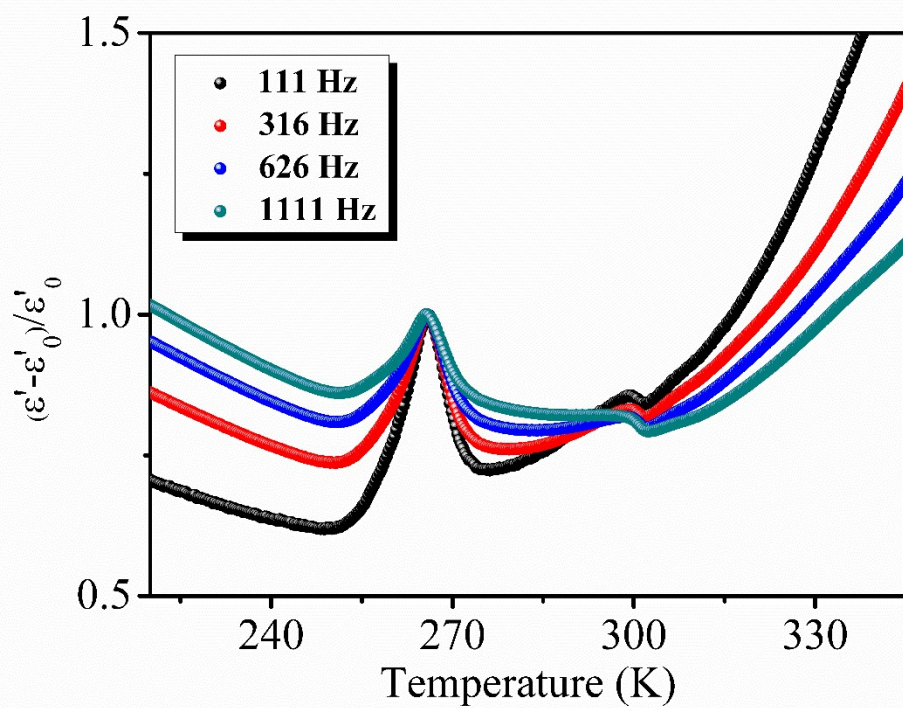

Figure S1. The normalized spectrum of permittivity measured under frequencies at 111 Hz, 316 Hz, 626 Hz and 1111 Hz. The sample were treated by oxygen exposure.

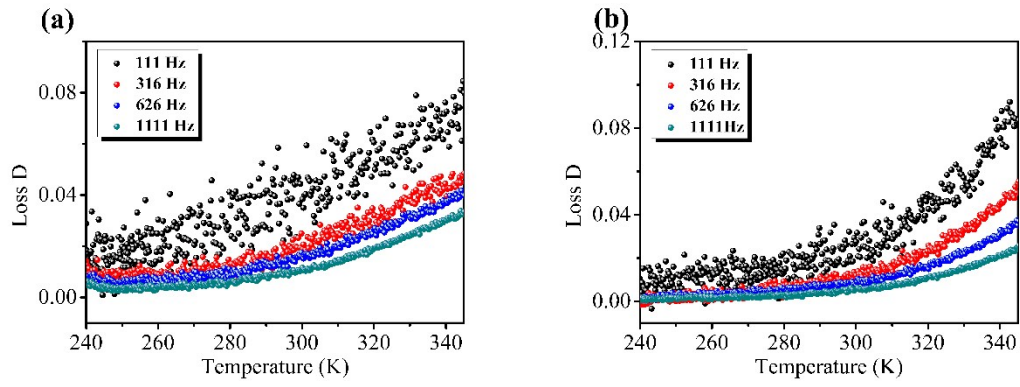

Figure S2. The DL measurement for (a) MAI, and (b) PbI<sub>2</sub>.

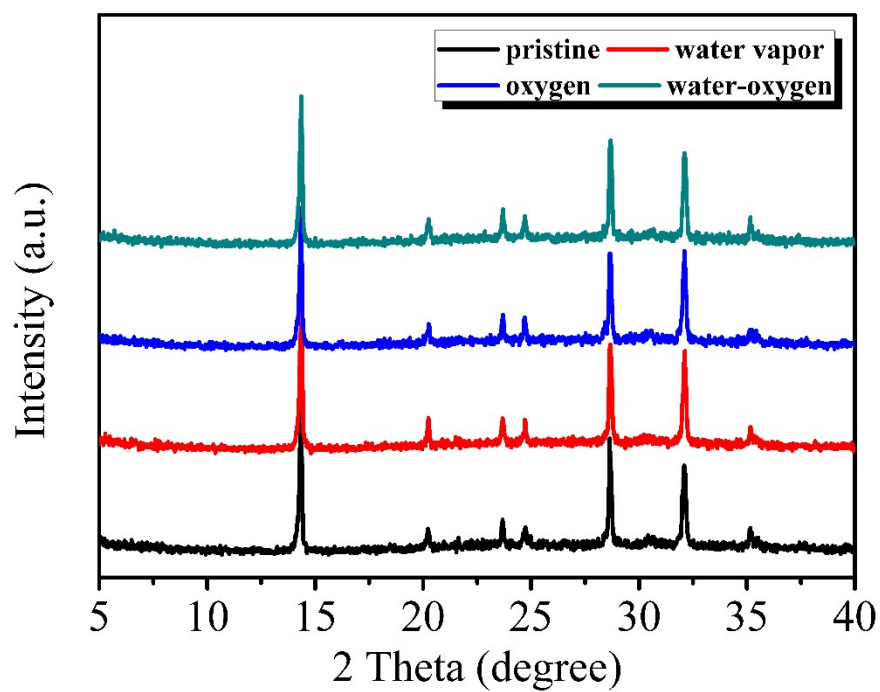

Figure S3. The XRD result for perovskite treated with variation condition.

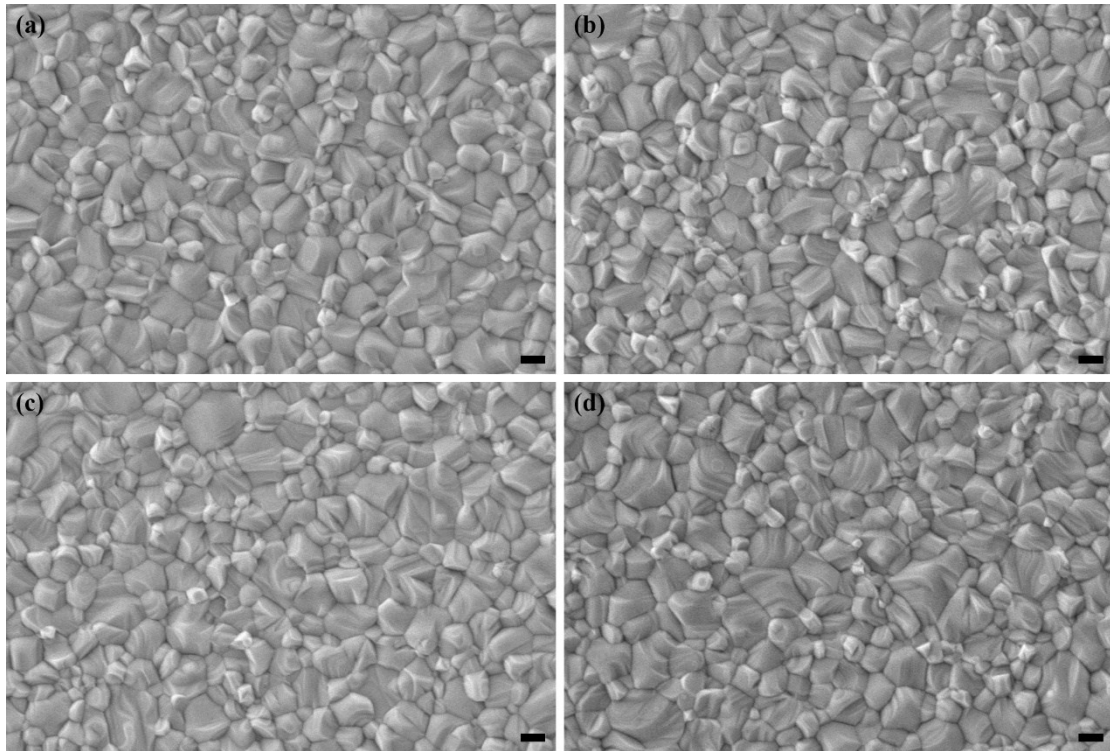

Figure S4. Top-view of scanning electron microscopy images of (a) pristine, (b) water vapor, (c) oxygen and (d) water-oxygen exposed perovskite films. The scale bar is 200 nm.

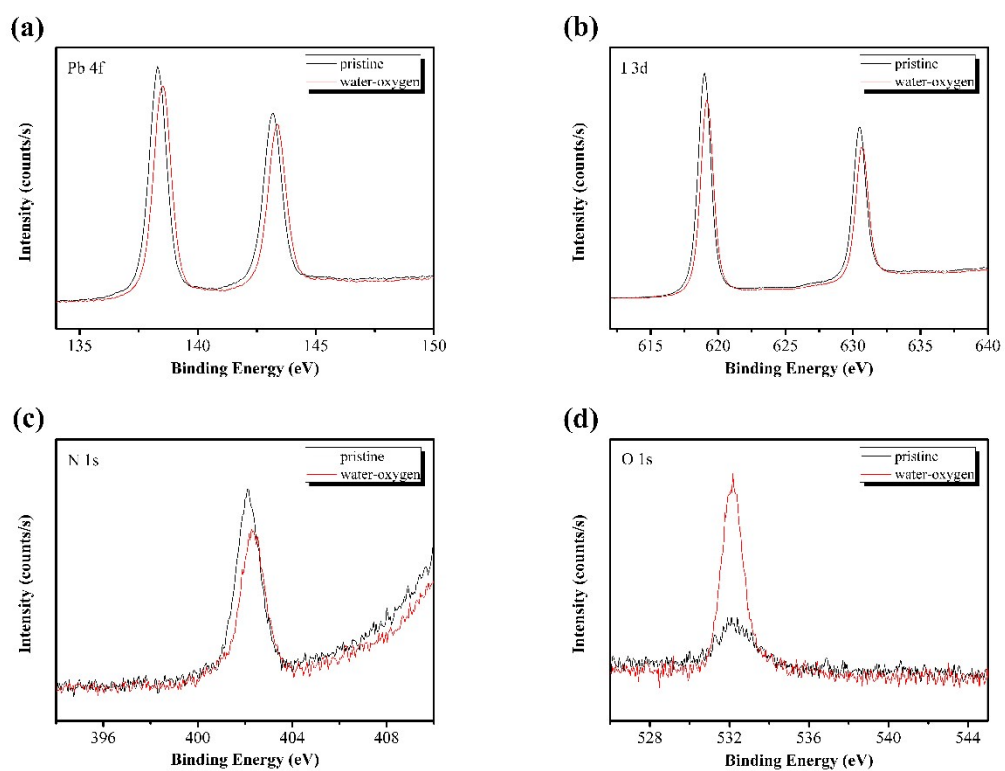

Figure S5. (a) Pb 4f, (b) I 3d, (c) N 1s and (d) O 1s core level spectra of the perovskite films before and after water-oxygen exposure.
