# Supplementary figures and images for: Water and oxygen co-induced microstructure relaxation and evolution in CH3NH3PbI3
Source: Royal Society of Chemistry journal article supplement (doi:10.1039/d1cp02704b), 2021-01-01

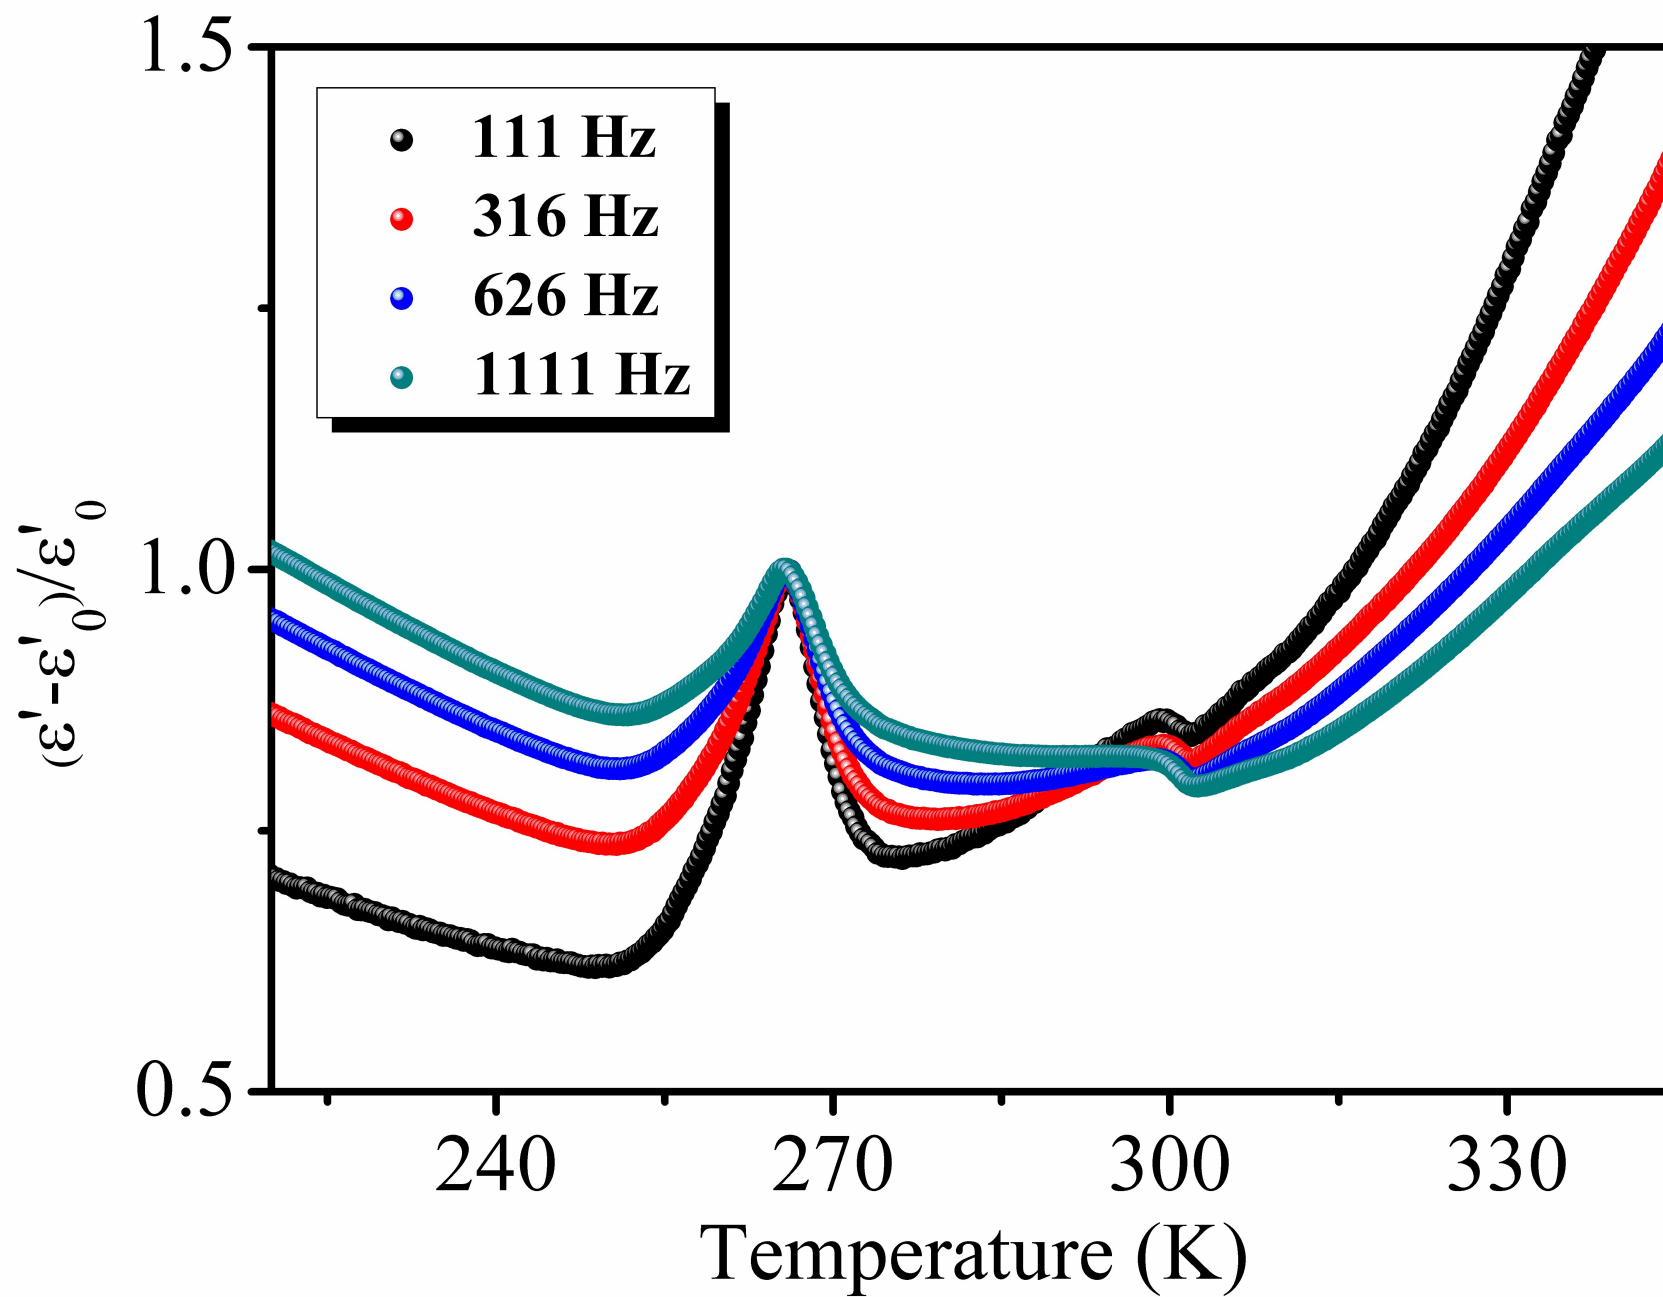

Supplement: d1cp02704b3.pdf [file d1cp02704b3.pdf]

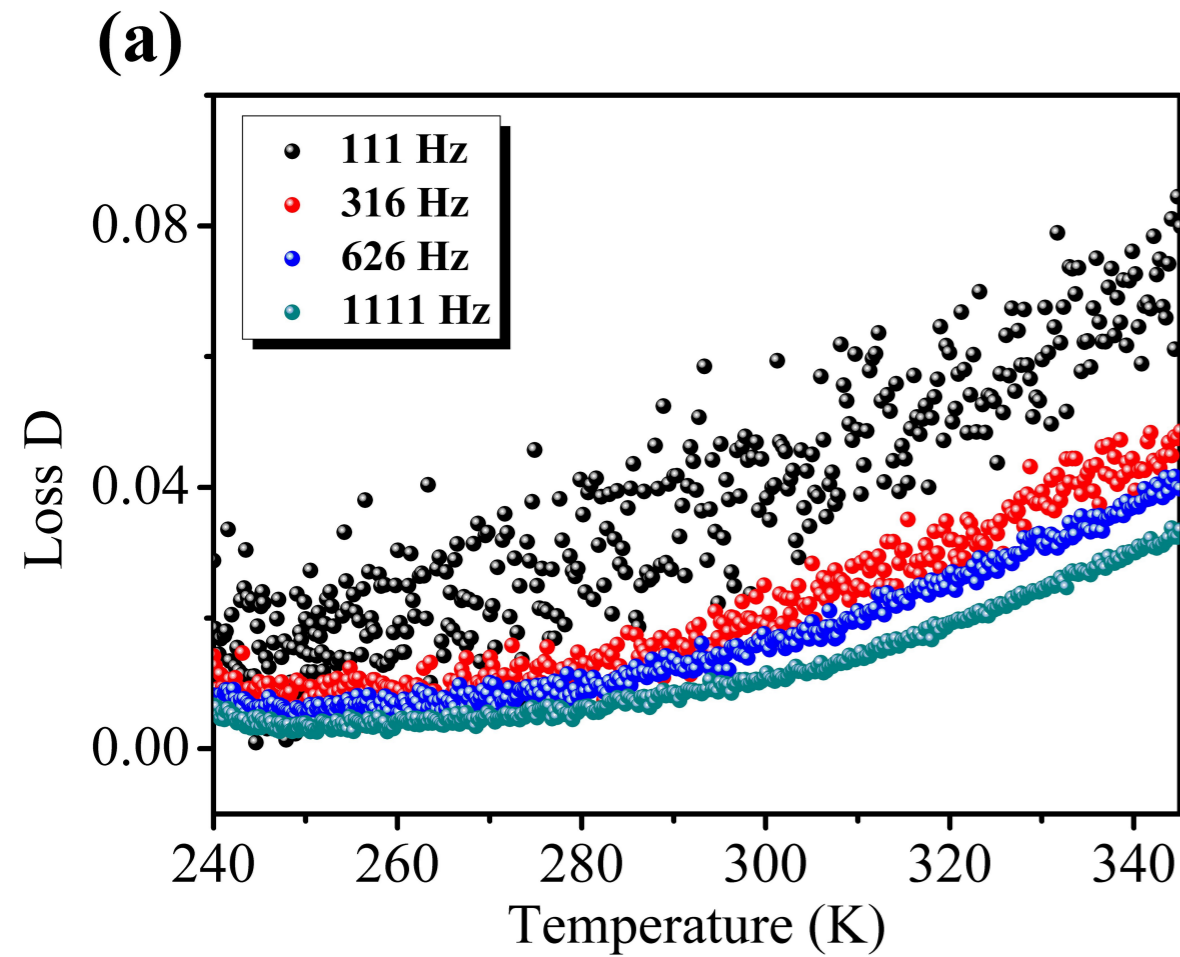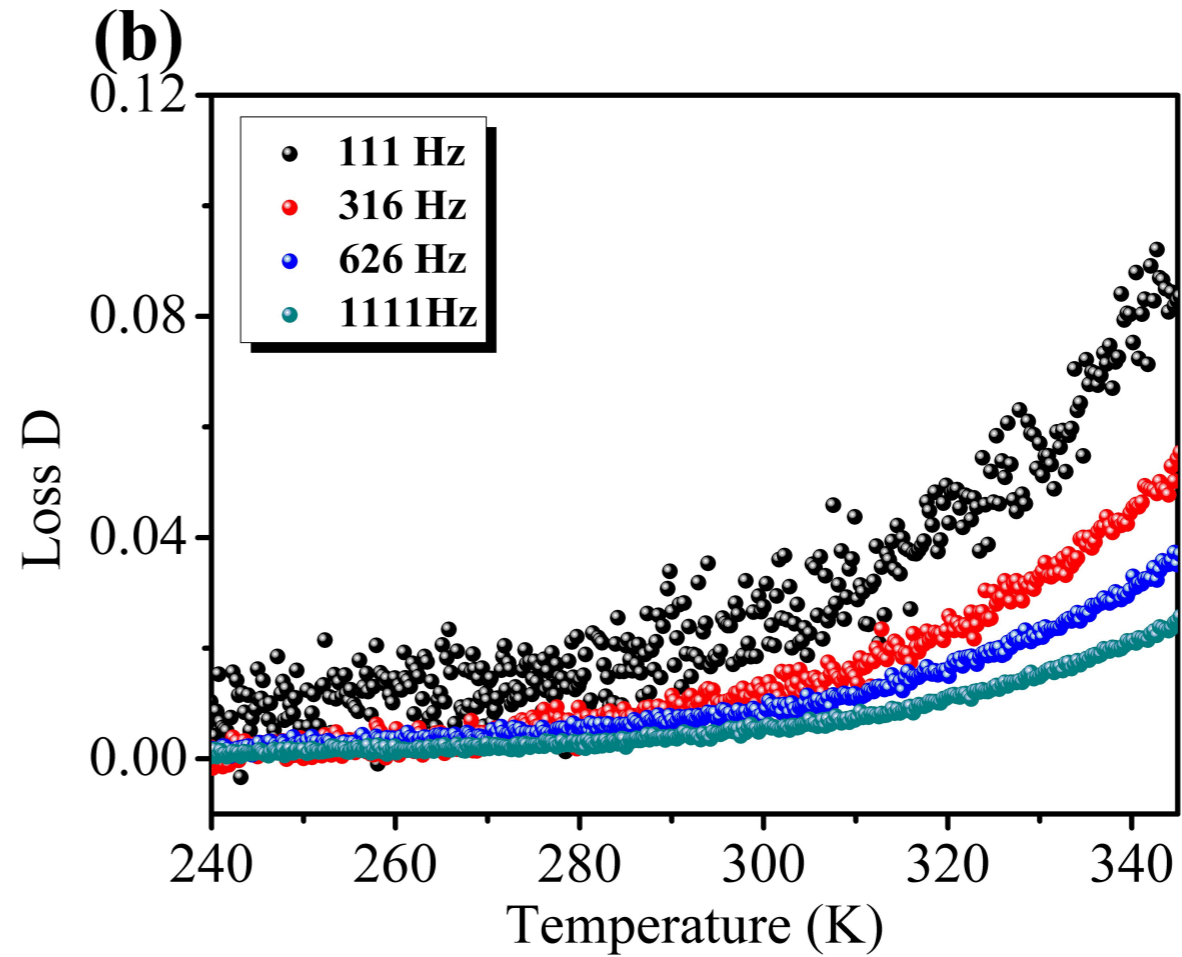

Supplement: d1cp02704b4.pdf [file d1cp02704b4.pdf]

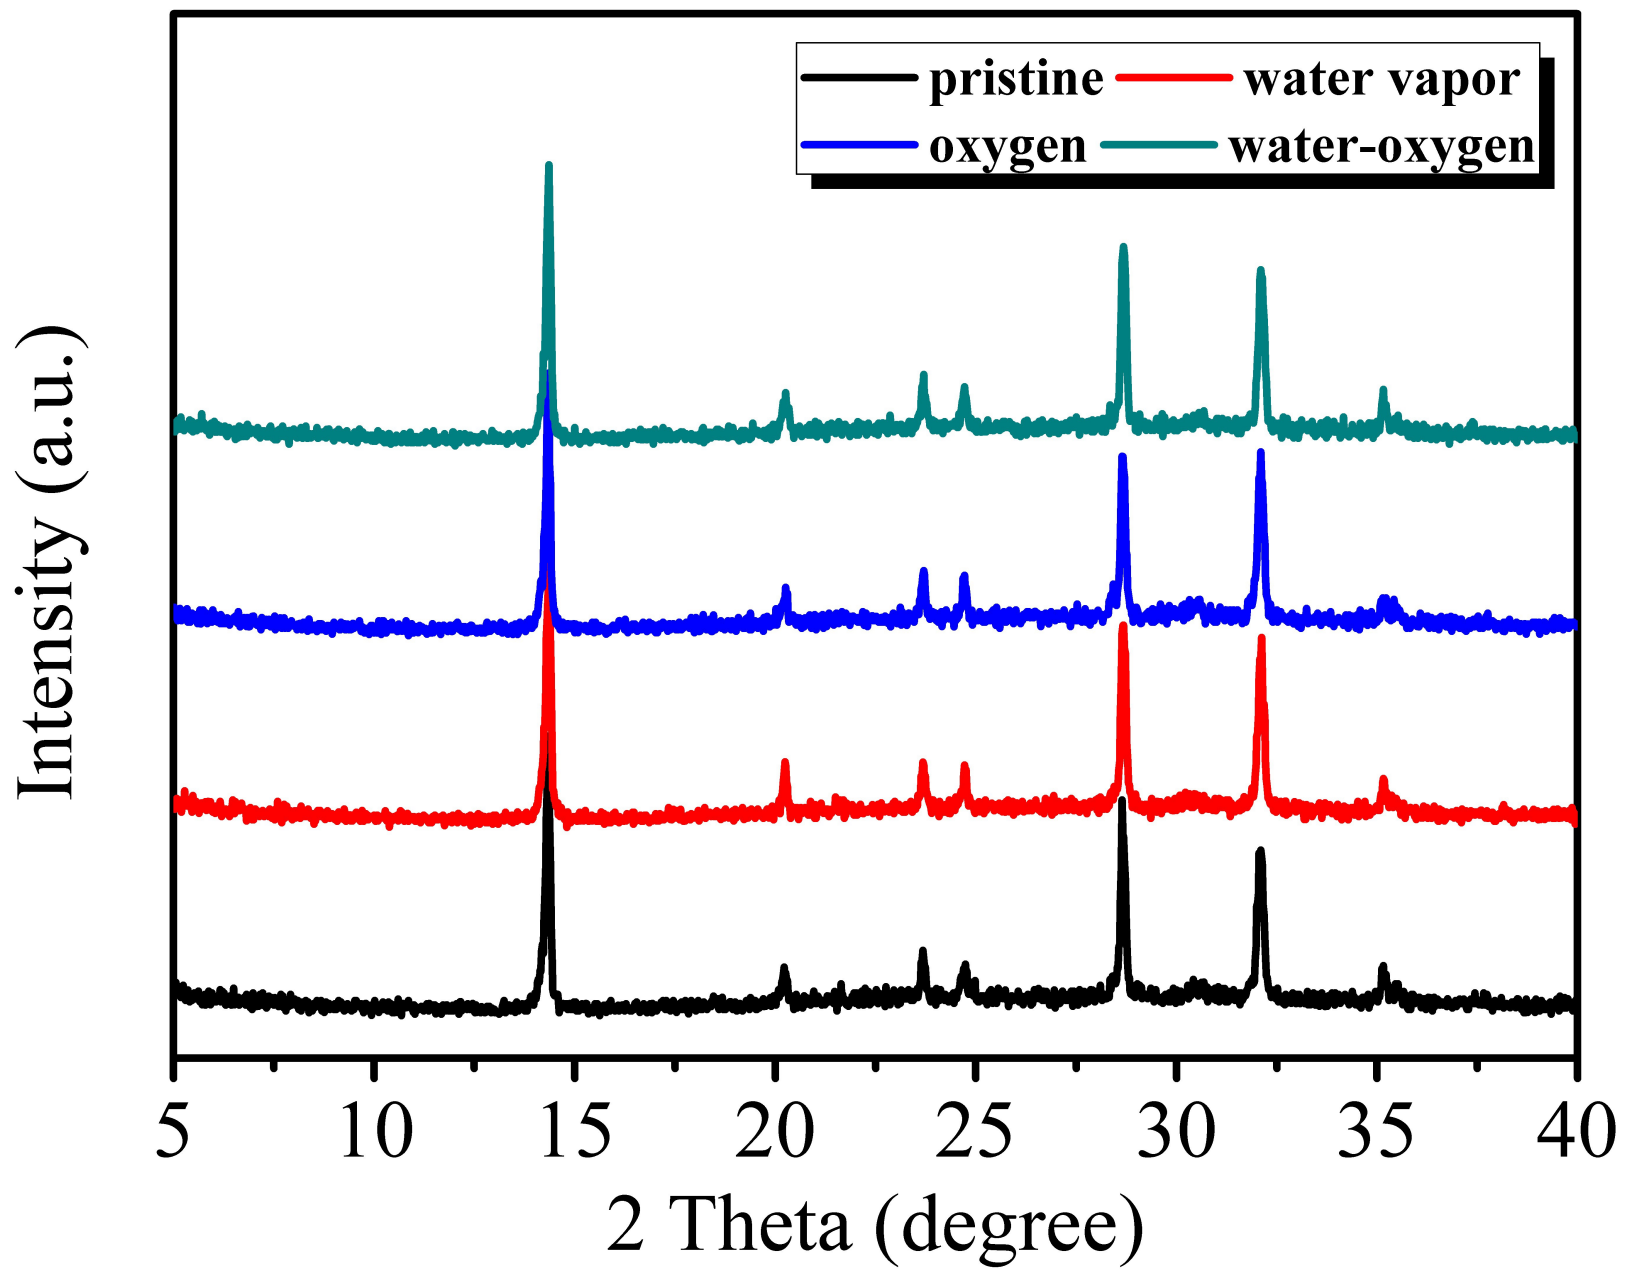

Supplement: d1cp02704b5.pdf [file d1cp02704b5.pdf]

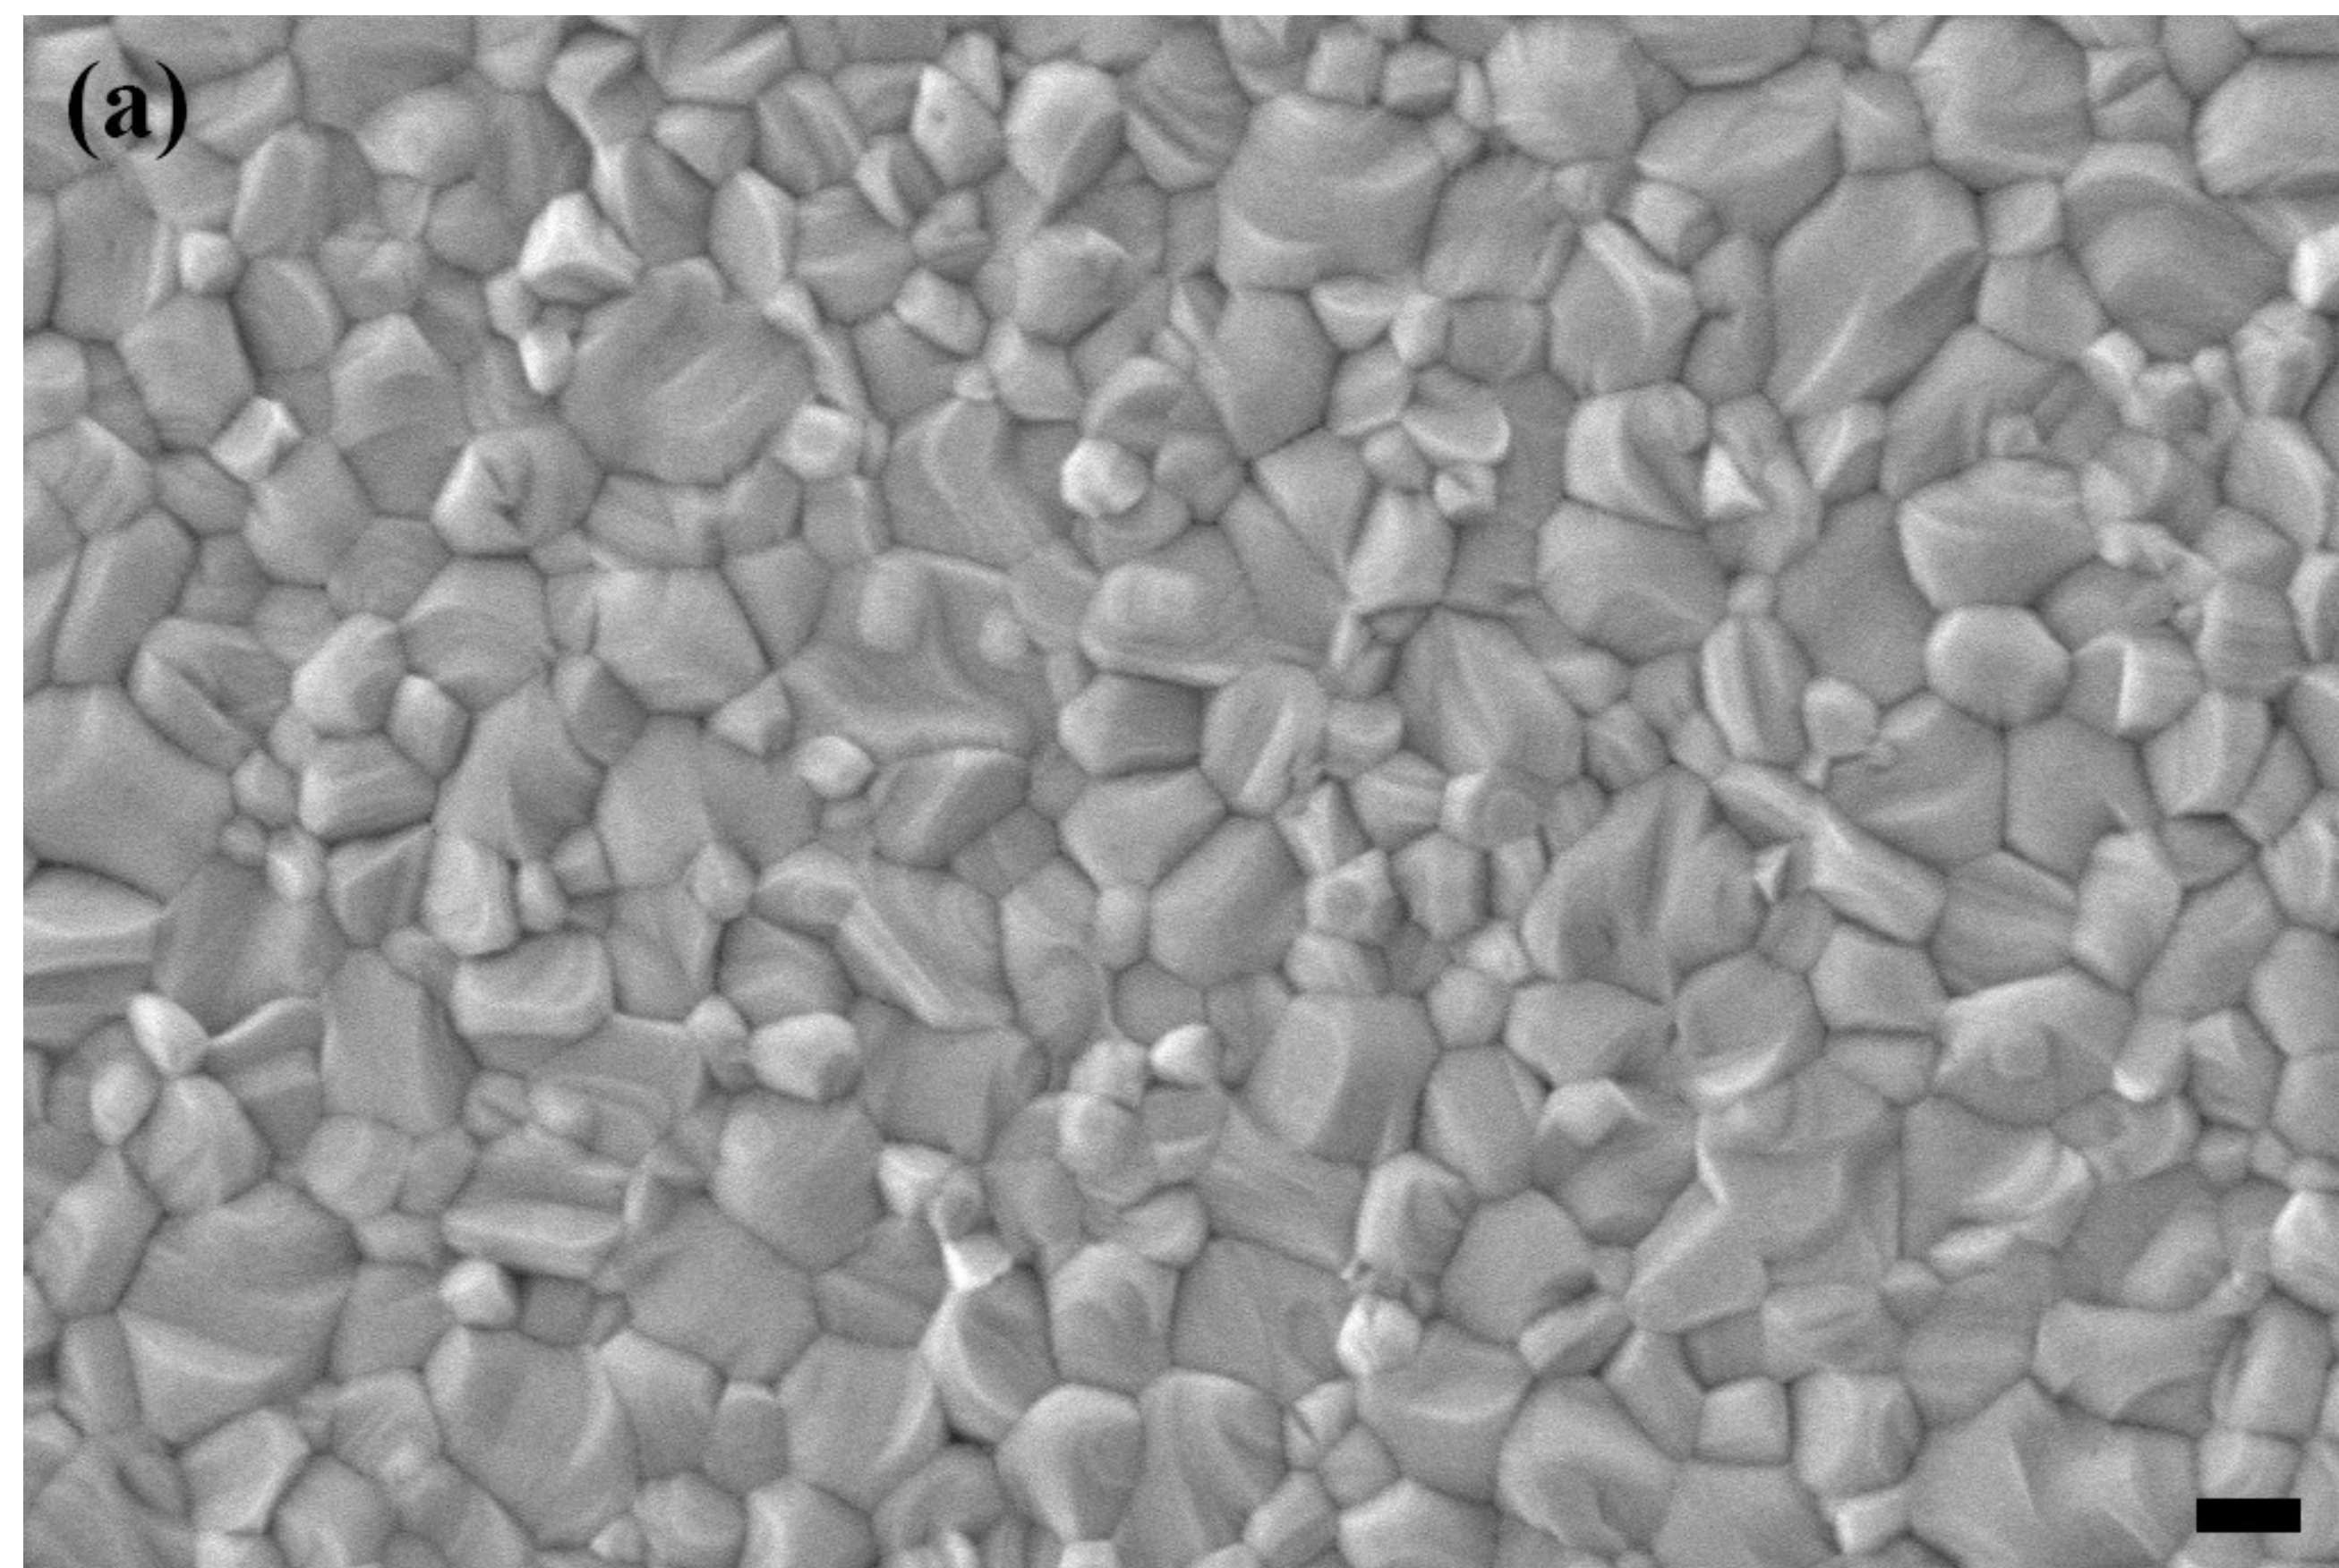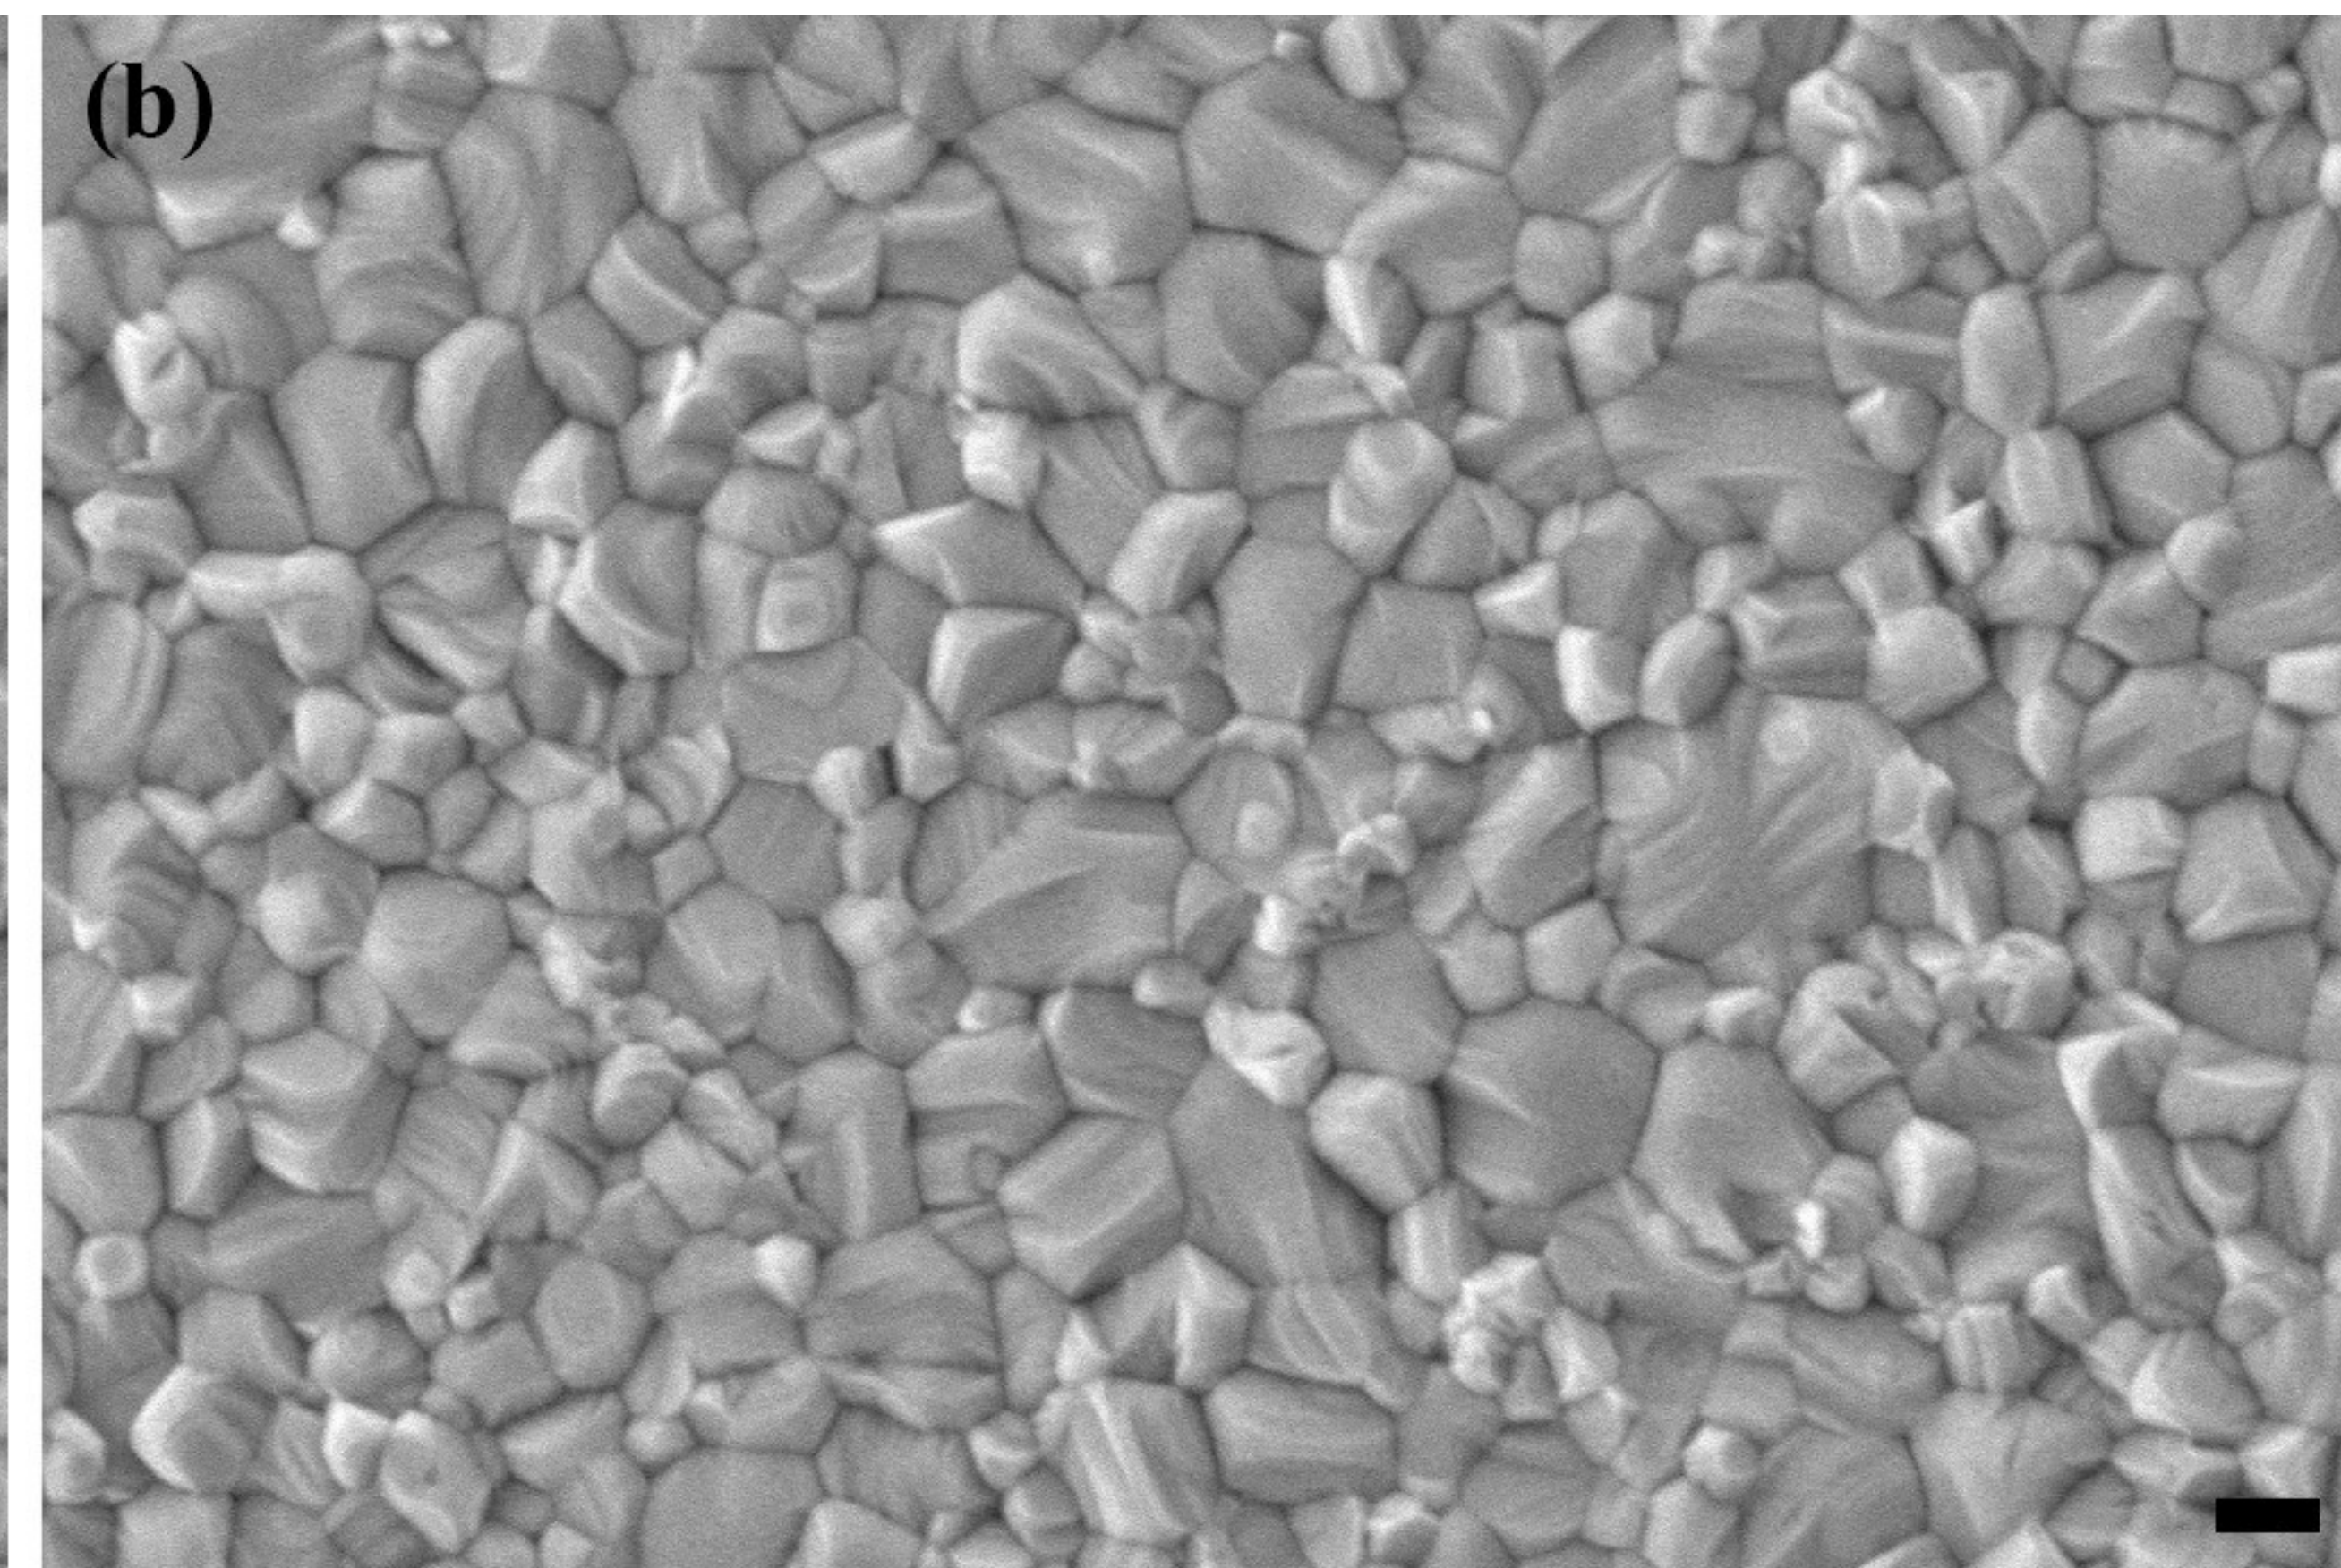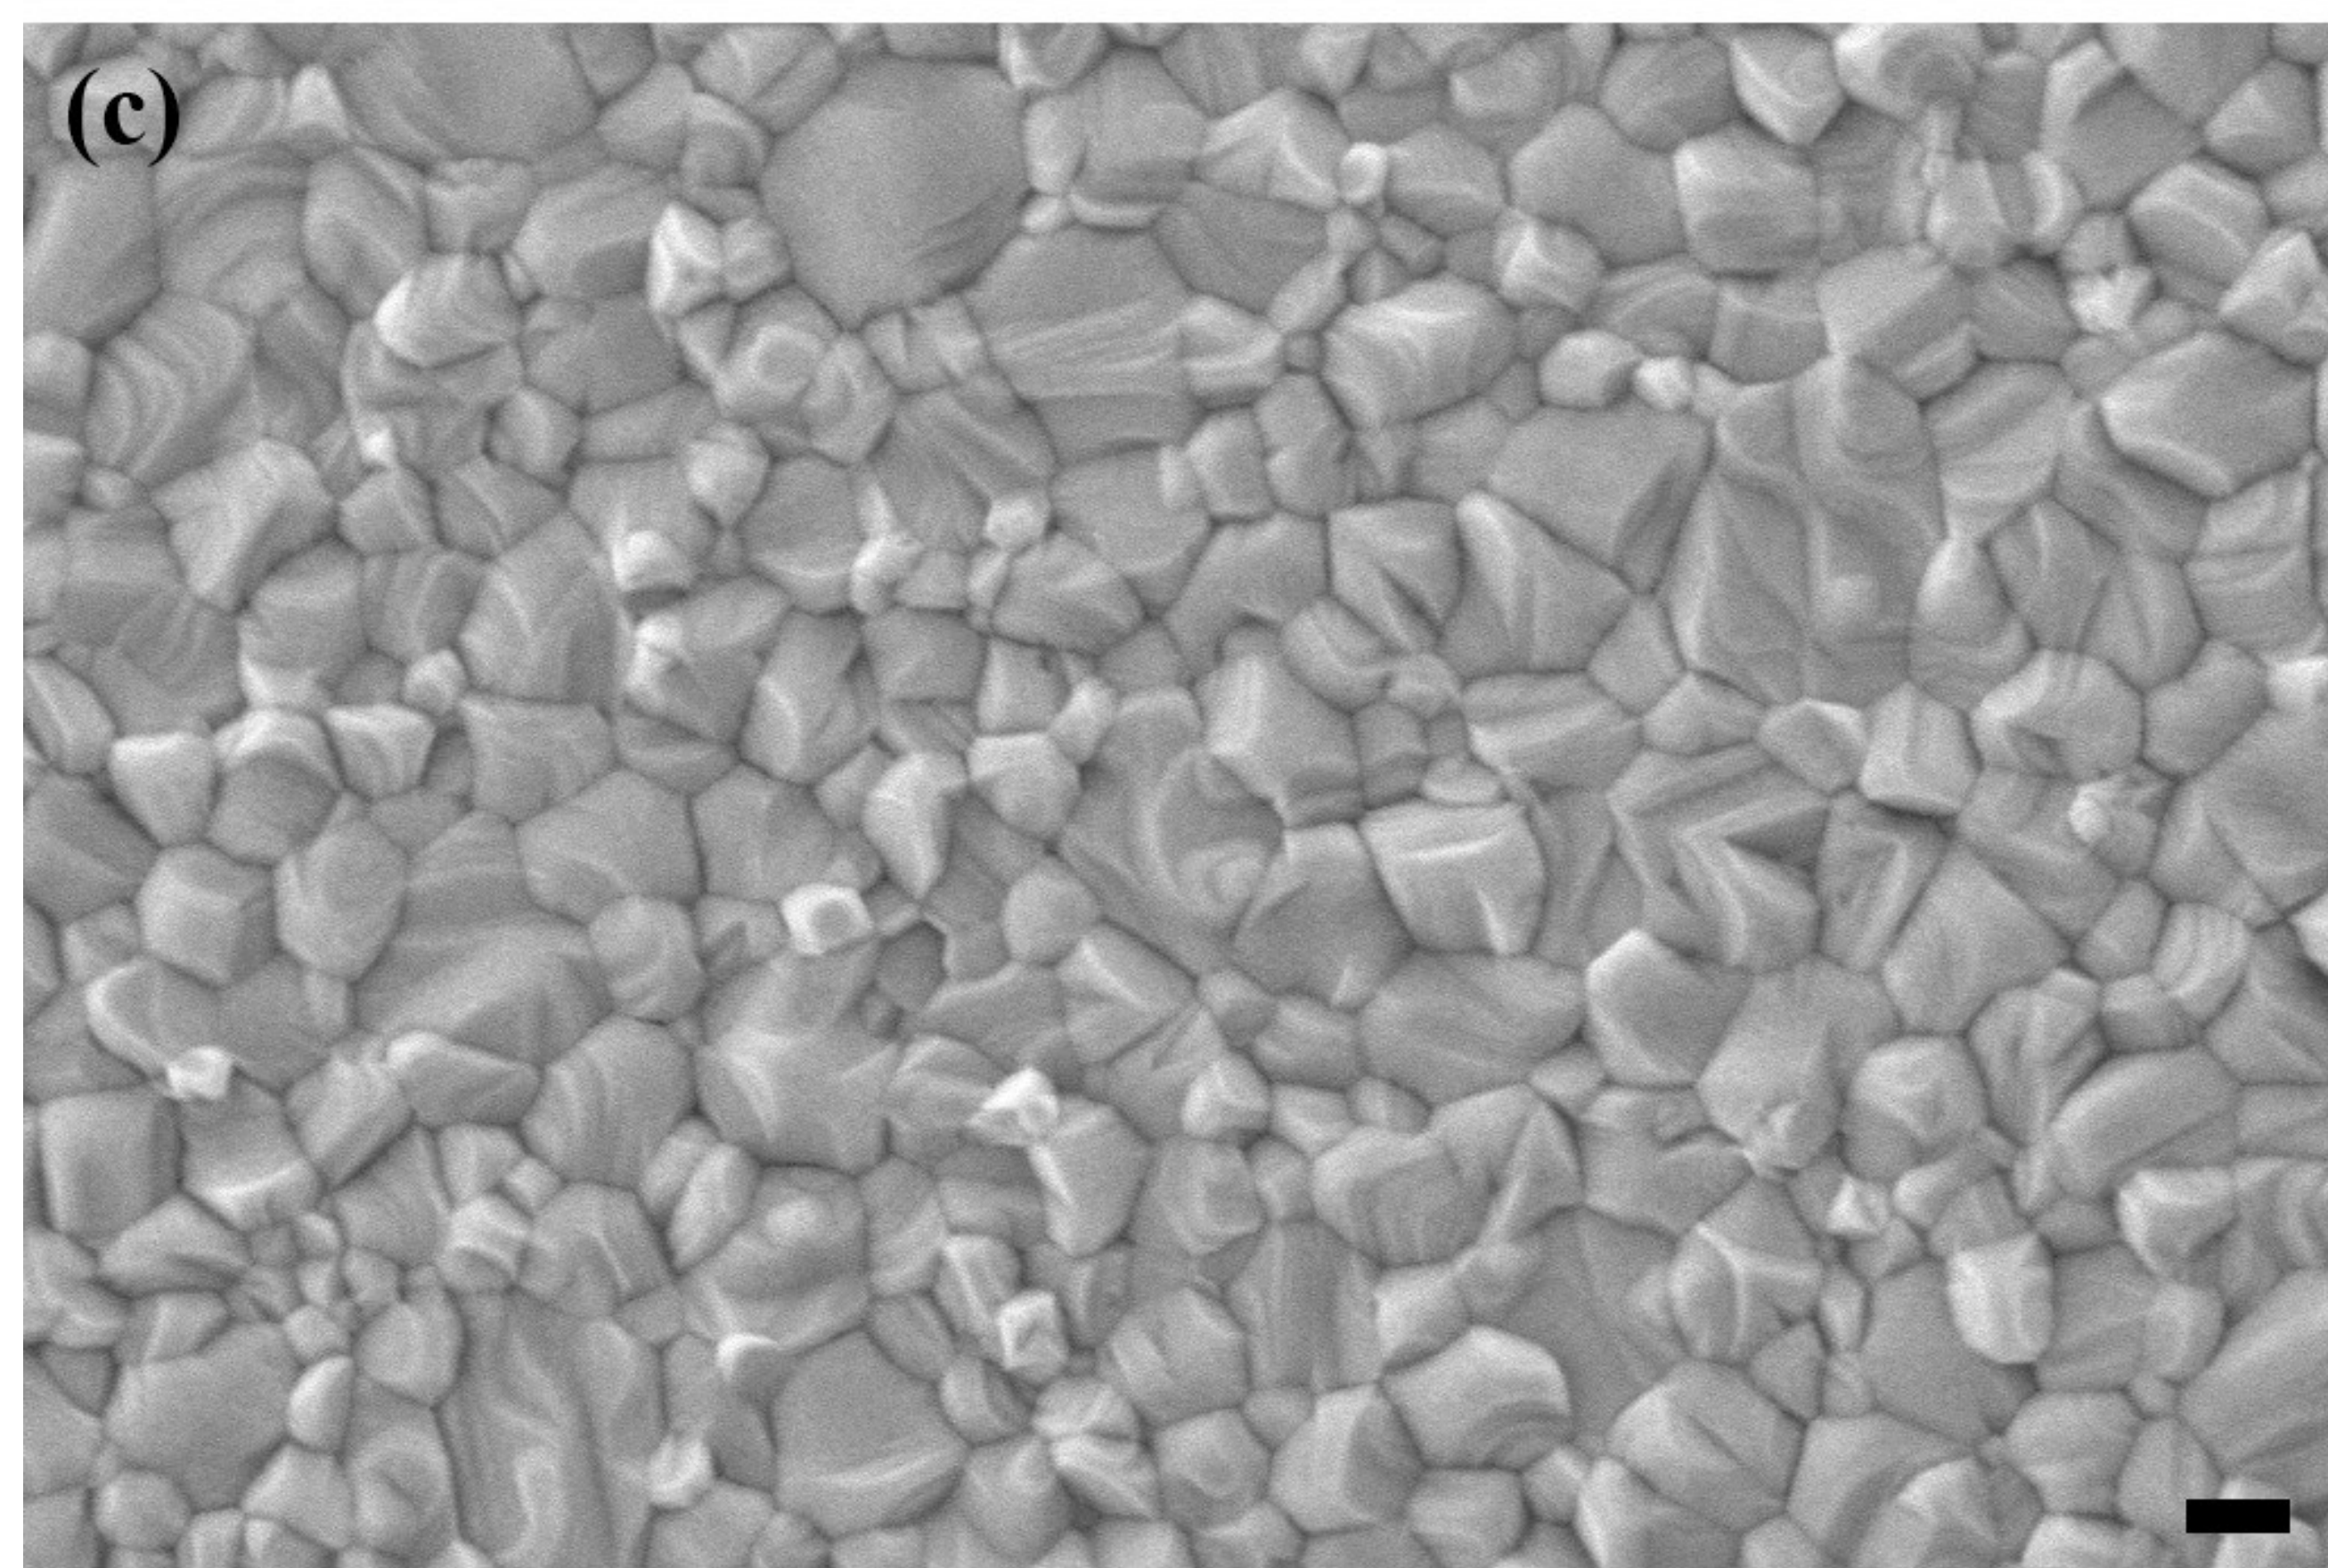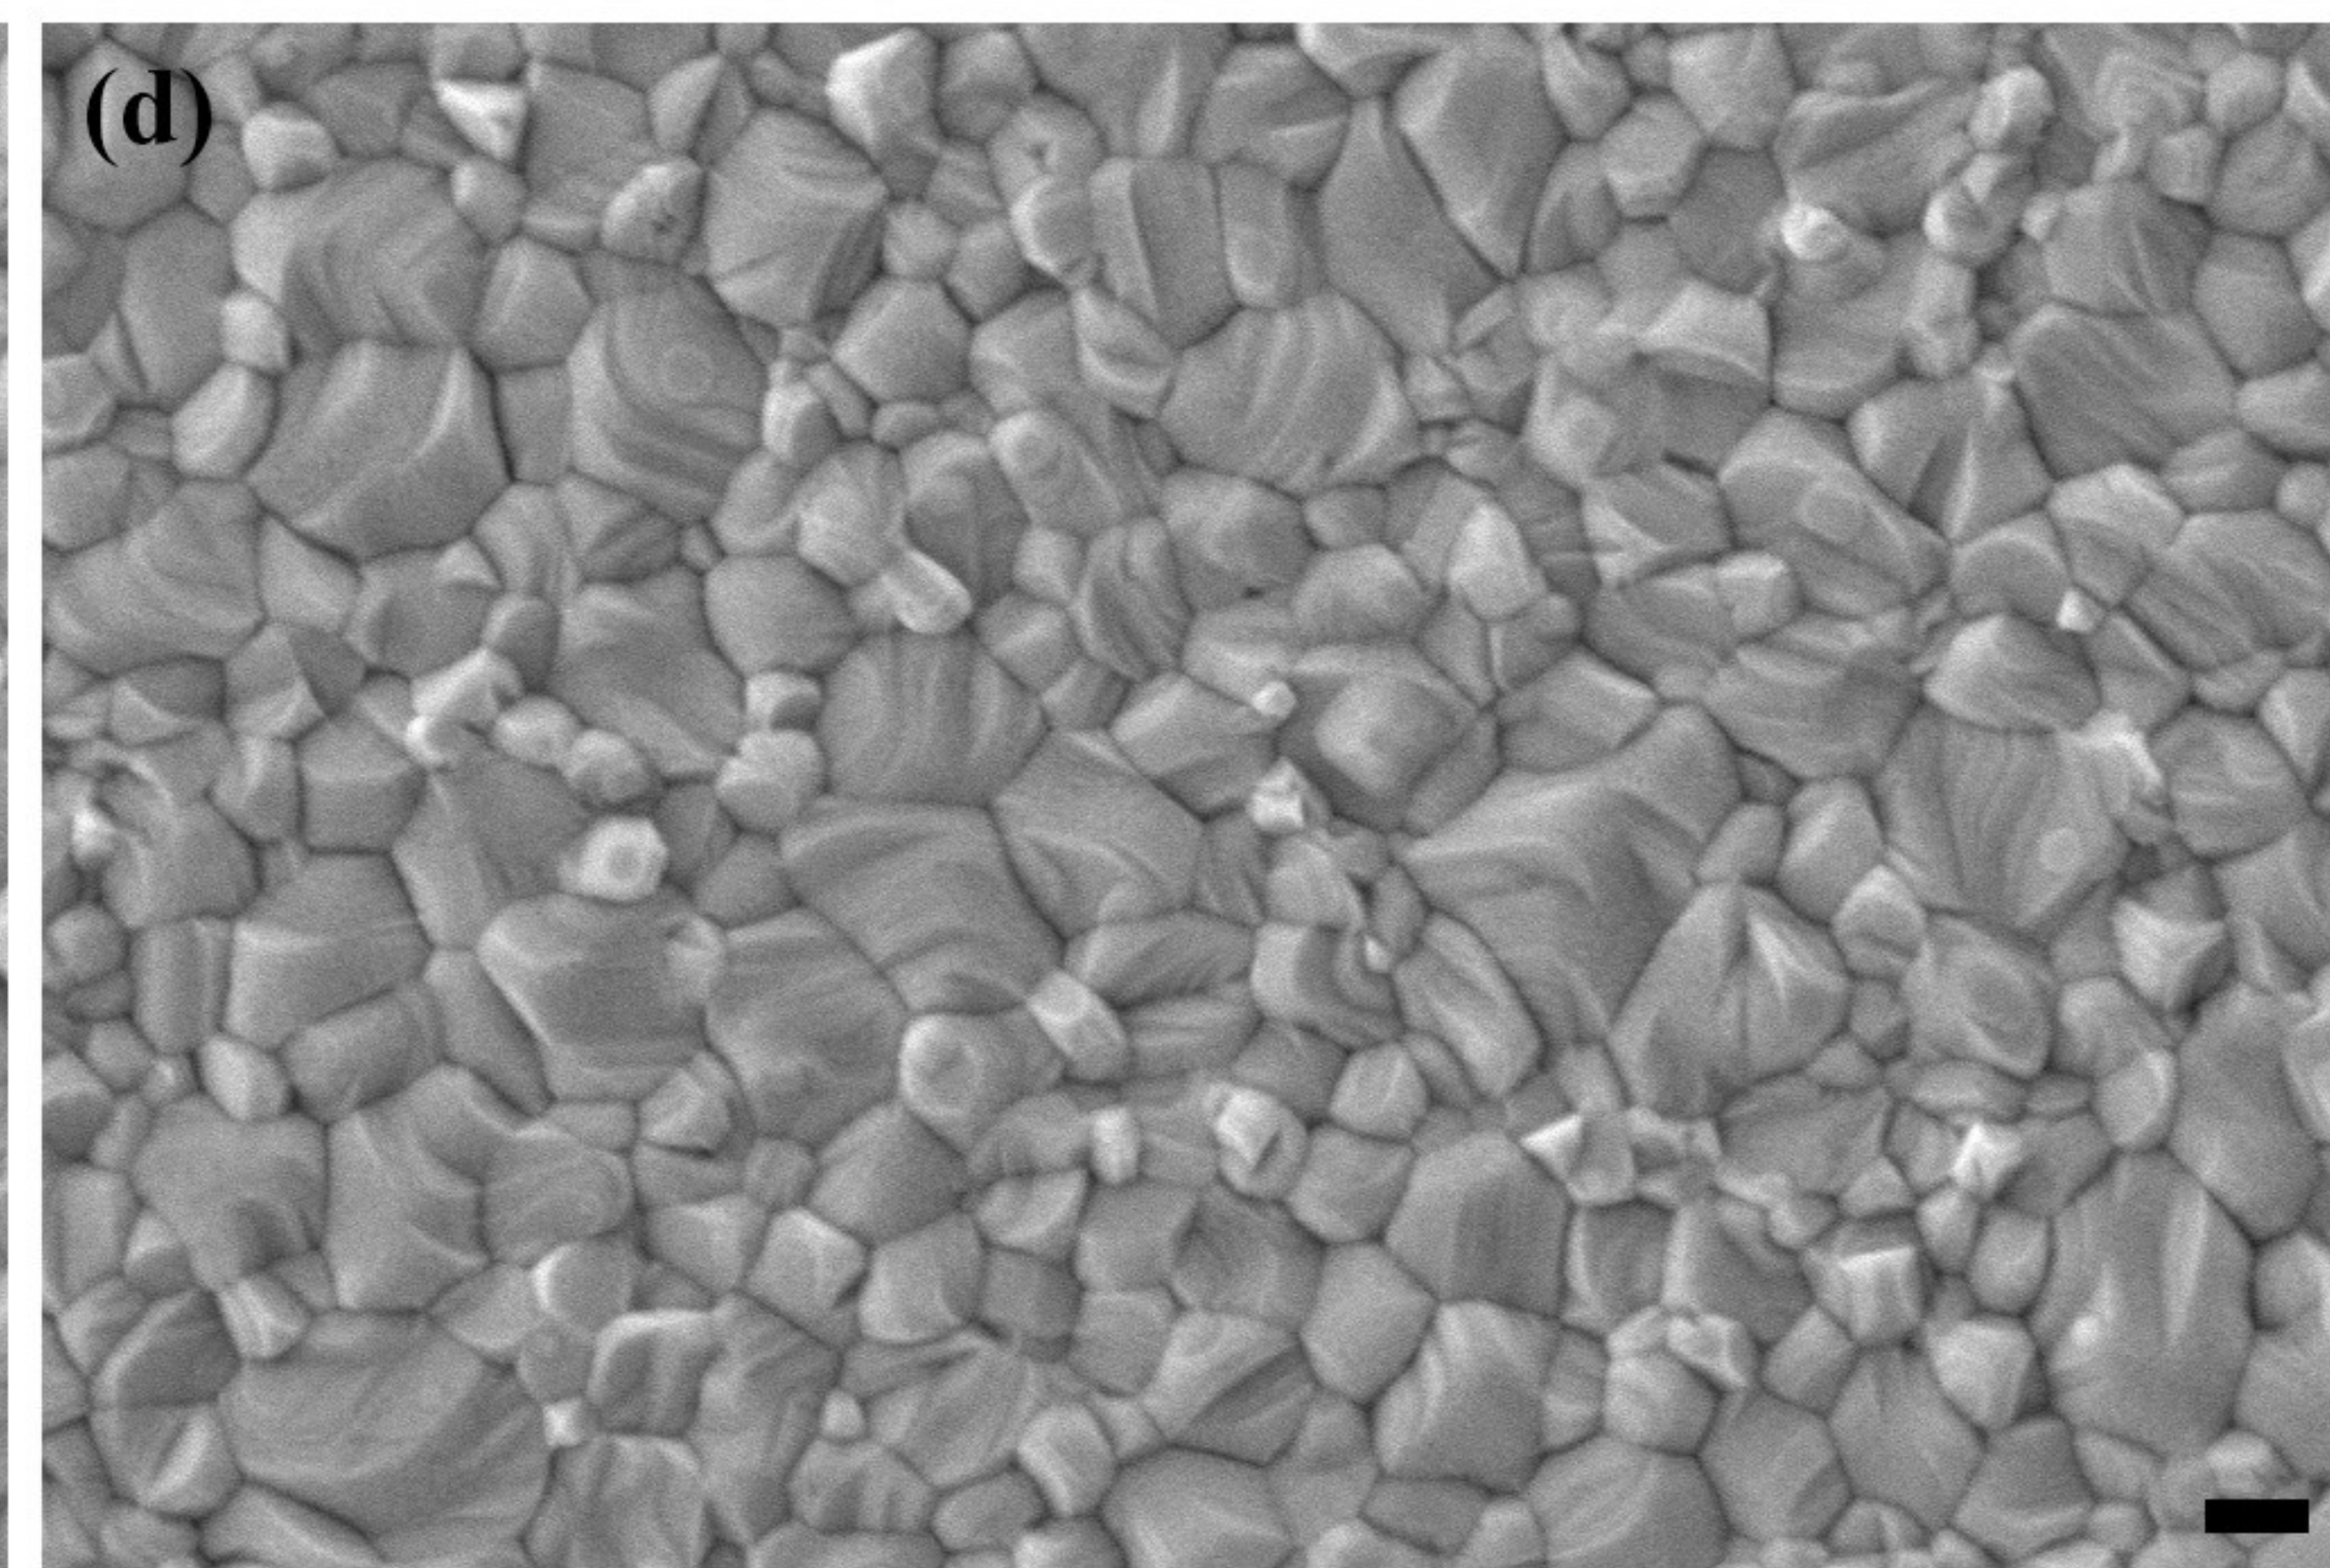

Supplement: d1cp02704b6.pdf [file d1cp02704b6.pdf]

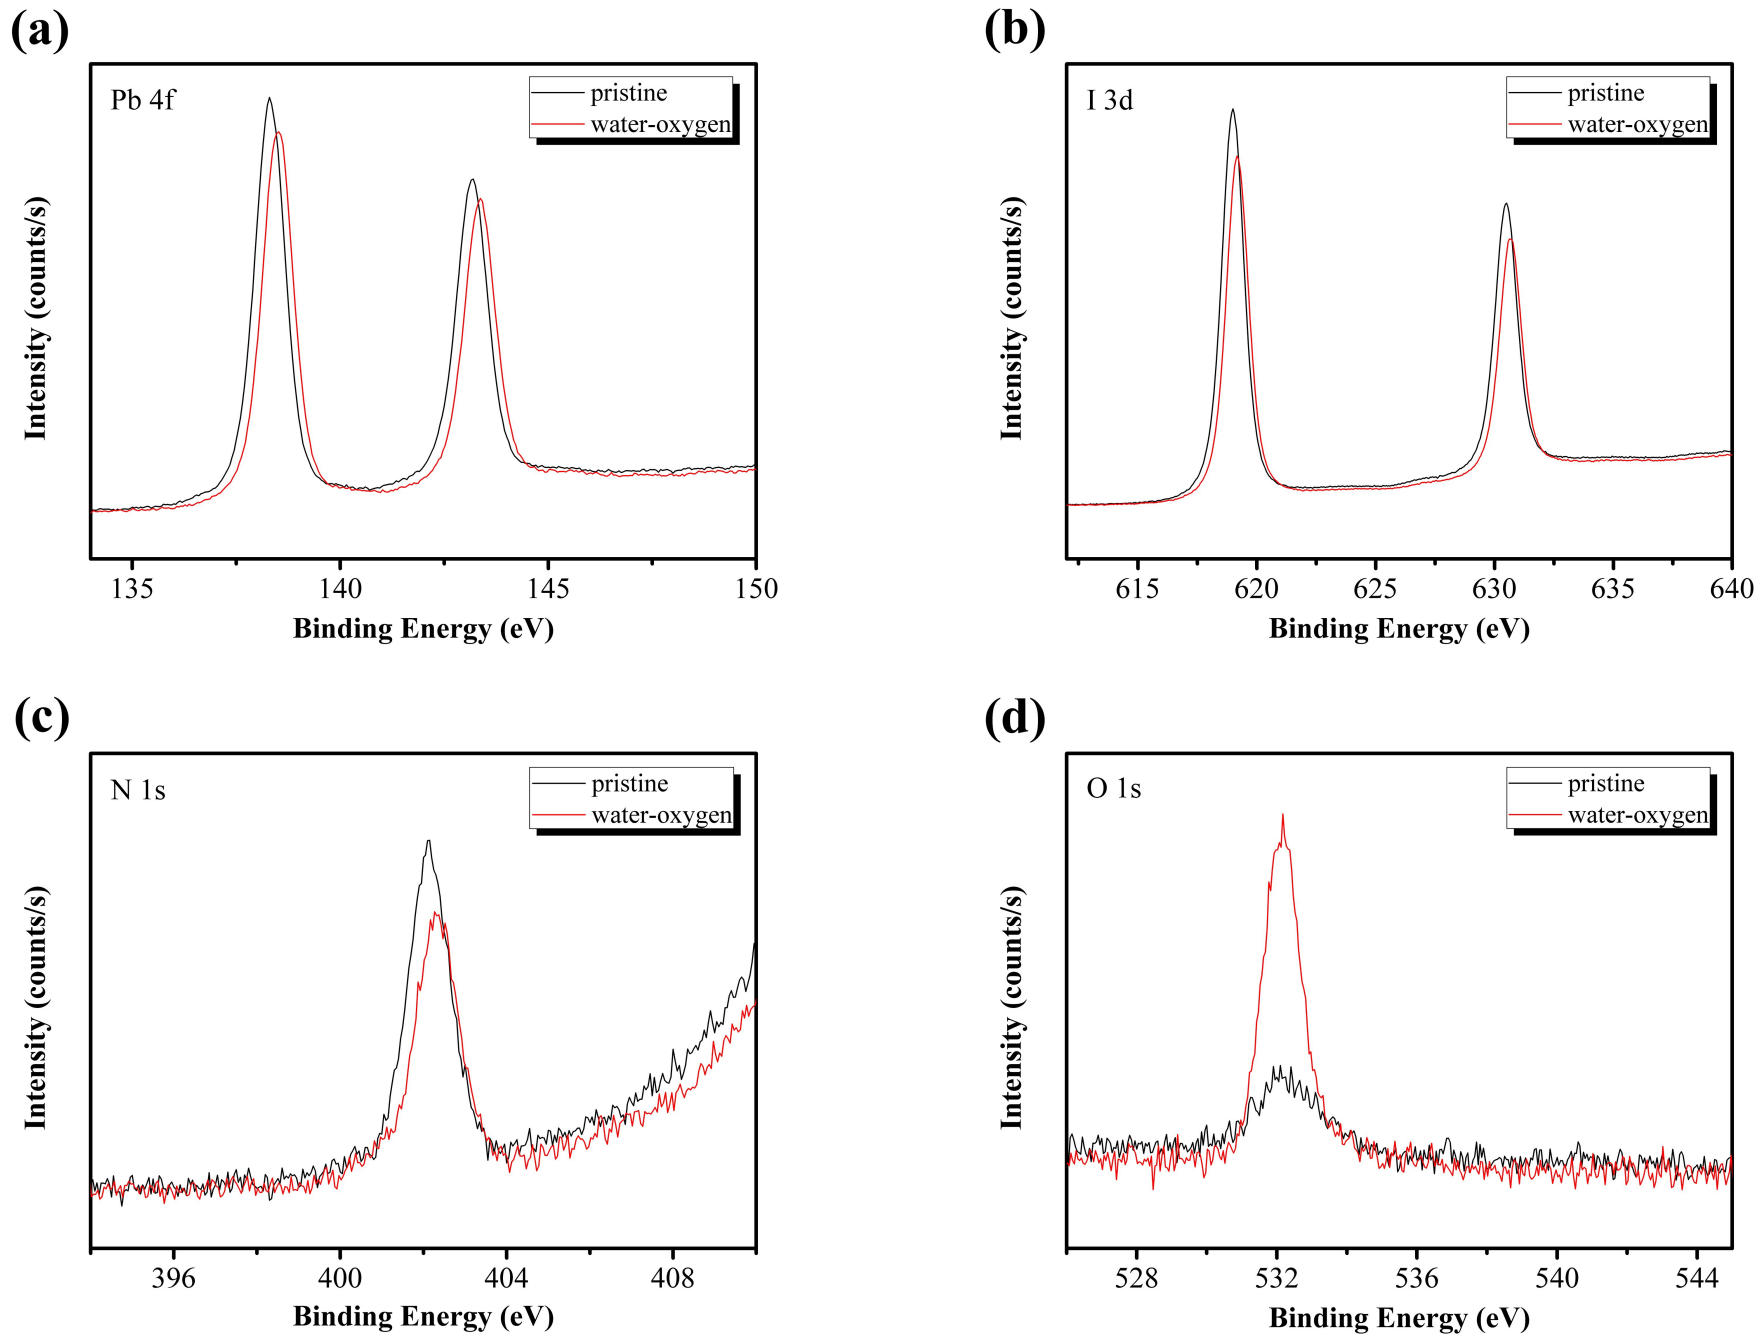

Supplement: d1cp02704b7.pdf [file d1cp02704b7.pdf]
